# Supplementary material for: Butyrate enhances Clostridioides difficile sporulation in vitro
Source: PubMed Central journal article supplement (PMC10521354; doi:10.1128/jb.00138-23), 2023-09-01
Supplement: jb.00138-23-s0001.pdf [file jb.00138-23-s0001.pdf]

## Supplemental Outline:

**Figure S1. Butyrate does not significantly impact the growth of *C. difficile* strains R20291 or VPI10643.** Growth curves ( $\log_{10}(\text{OD}_{600})$ ) of *C. difficile* **A)** strain R20291 and **B)** strain VPI10463 over 24 hours in presence of 5 and 25 mM acetate, propionate, and butyrate in BHI.

**Figure S2. Butyrate-induced growth inhibition is not impacted by pH.** Growth of *C. difficile* strain 630 over 24 hours at pH 6.2 (panel 1), 7.2 (panel 2), and 8 (panel 3) in BHI supplemented with 5 or 25 mM acetate, propionate, and butyrate. P-value through Dunnett's test, \*p-value < 0.05; \*\*p-value < 0.01; \*\*\*p-value < 0.001.

**Figure S3. Short chain fatty acids increase toxin production in *C. difficile* strains R20291 and VPI10463.** Toxin activity ( $\log_{10}$  of toxin mg/ml normalized to average  $\log_{10}(\text{CFU/ml})$  of *C. difficile* strain **A)** R20291 and **B)** VPI10463 over 24 hours in BHI supplemented with 5 or 25 mM acetate, propionate, and butyrate as measured by an *in vitro* cell assay per  $\log_{10}$  (CFU/ml). P-value through Dunnett's test, \*p-value < 0.05; \*\*p-value < 0.01; \*\*\*p-value < 0.001.

**Figure S4. Butyrate increases the expression of carbohydrate metabolism genes.** Heatmap of selected significant genes representing the  $\log_2$ FoldChange of growth in butyrate versus without butyrate in early- and late-log calculated using DESeq in R as described for RNASeq analysis in Materials and Methods. Significance ( $p < 0.05$ ) was calculated using Wald's test; all genes listed are significantly over- or under-expressed over growth in BHI alone except *ccpA* (not significant).

**Figure S5. Butyrate modulates select *C. difficile* carbohydrate metabolism and virulence regulators.** Relative abundance of normalized transcript counts of select significant genes in

early- and late-log. Normalized transcripts were obtained using nnTransform in DESeq. The significance was calculated by one-way ANOVA between transcripts from BHI growth with or without butyrate \*p-value < 0.05; \*\*p-value < 0.01; \*\*\*p-value < 0.001

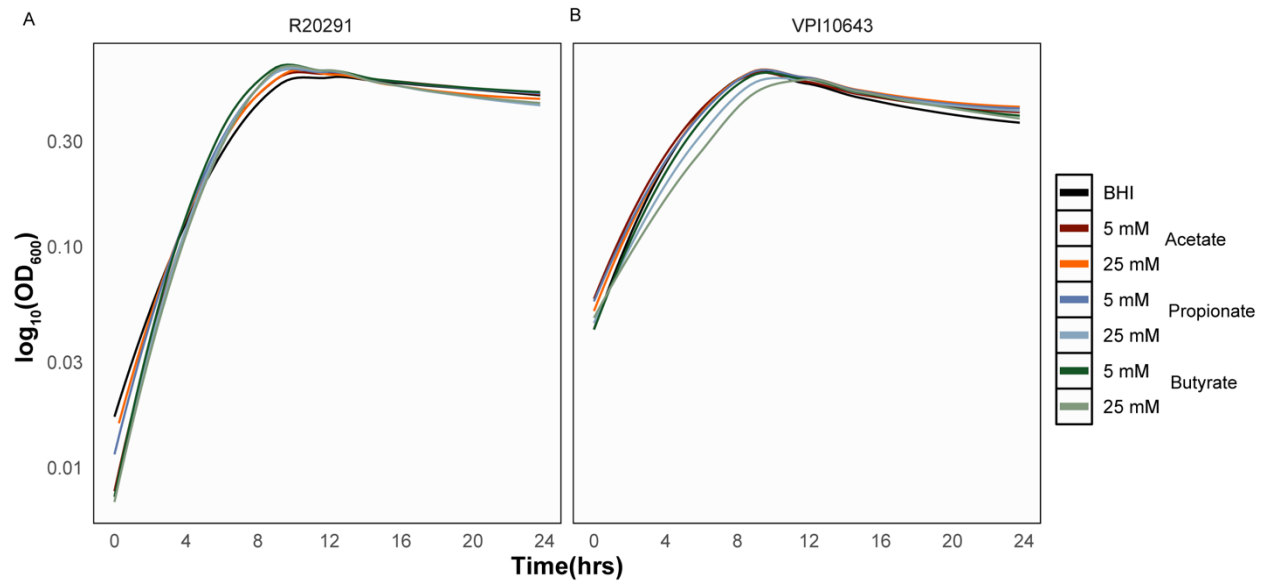

**Figure S1. Butyrate does not significantly impact the growth of *C. difficile* strains R20291 or VPI10643.** Growth curves ( $\log_{10}(\text{OD}_{600})$ ) of *C. difficile* **A)** strain R20291 and **B)** strain VPI10463 over 24 hours in presence of 5 and 25 mM acetate, propionate, and butyrate in BHI.

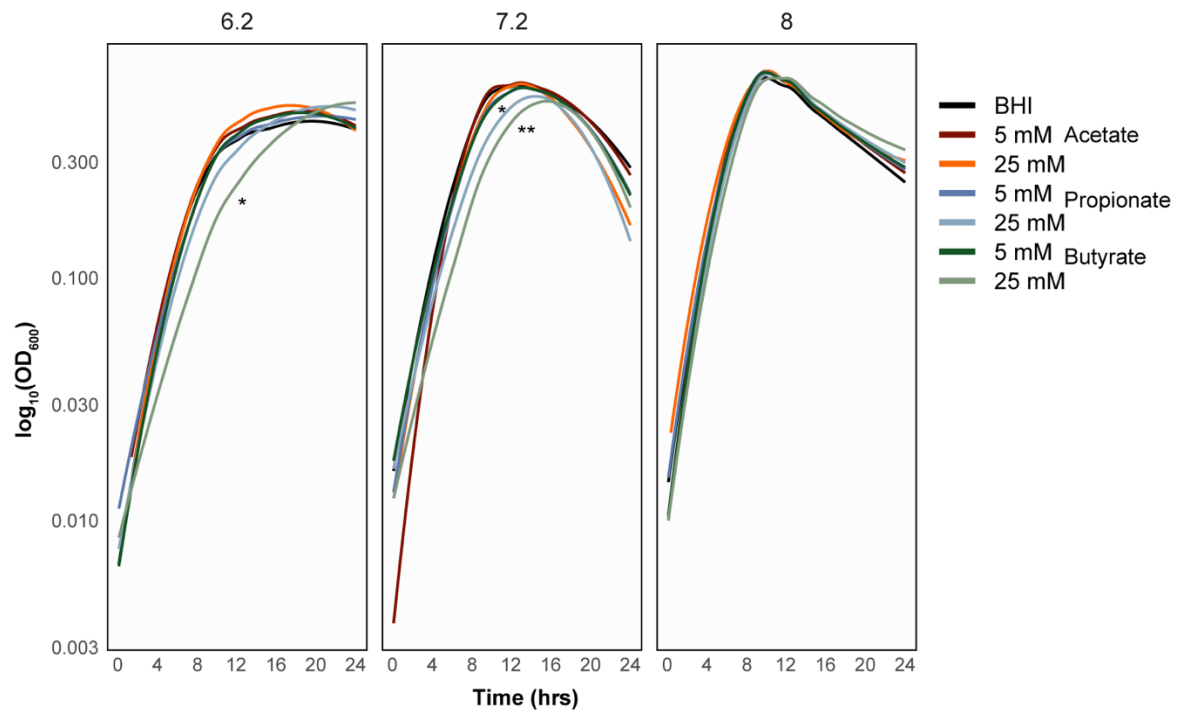

**Figure S2. Butyrate-induced growth inhibition is not impacted by pH.** Growth of *C. difficile* strain 630 over 24 hours at pH 6.2 (panel 1), 7.2 (panel 2), and 8 (panel 3) in BHI supplemented with 5 or 25 mM acetate, propionate, and butyrate. P-value through Dunnett's test, \*p-value < 0.05; \*\*p-value < 0.01; \*\*\*p-value < 0.001.

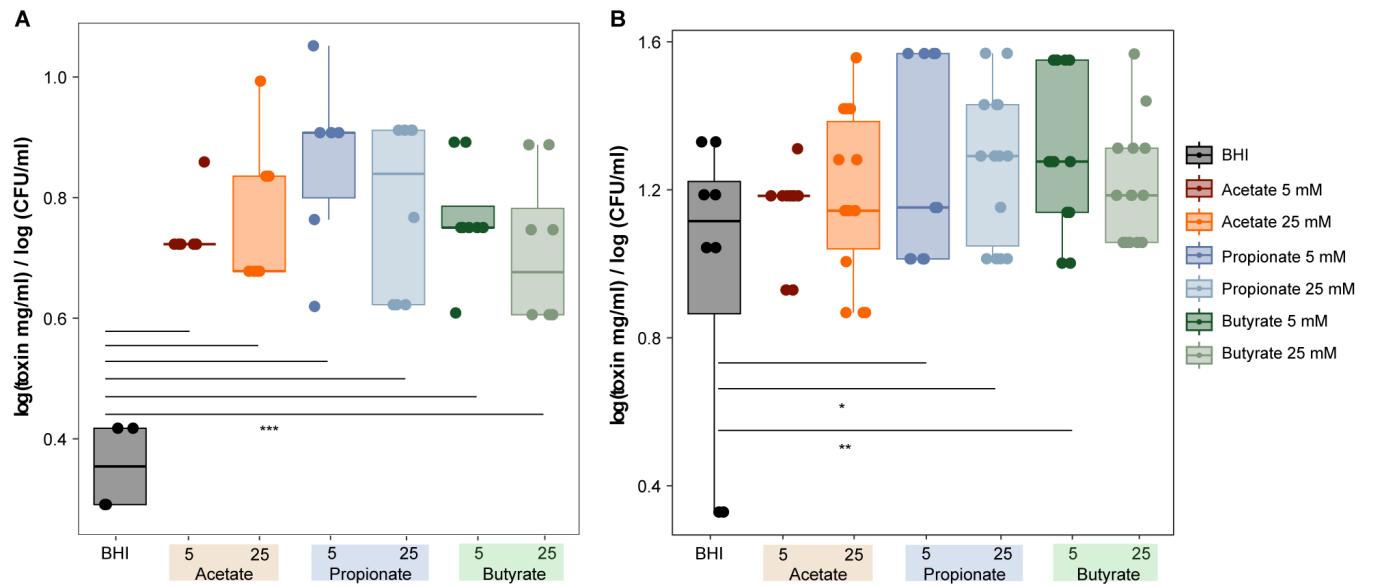

**Figure S3. Short chain fatty acids increase toxin production in *C. difficile* strains R20291 and VPI10463.** Toxin activity ( $\log_{10}$  of toxin mg/ml normalized to average  $\log_{10}$ (CFU/ml) of *C. difficile* strain **A**) R20291 and **B**) VPI10463 over 24 hours in BHI supplemented with 5 or 25 mM acetate, propionate, and butyrate as measured by an *in vitro* cell assay per  $\log_{10}$  (CFU/ml). P-value through Dunnett's test, \*p-value < 0.05; \*\*p-value < 0.01; \*\*\*p-value < 0.001.

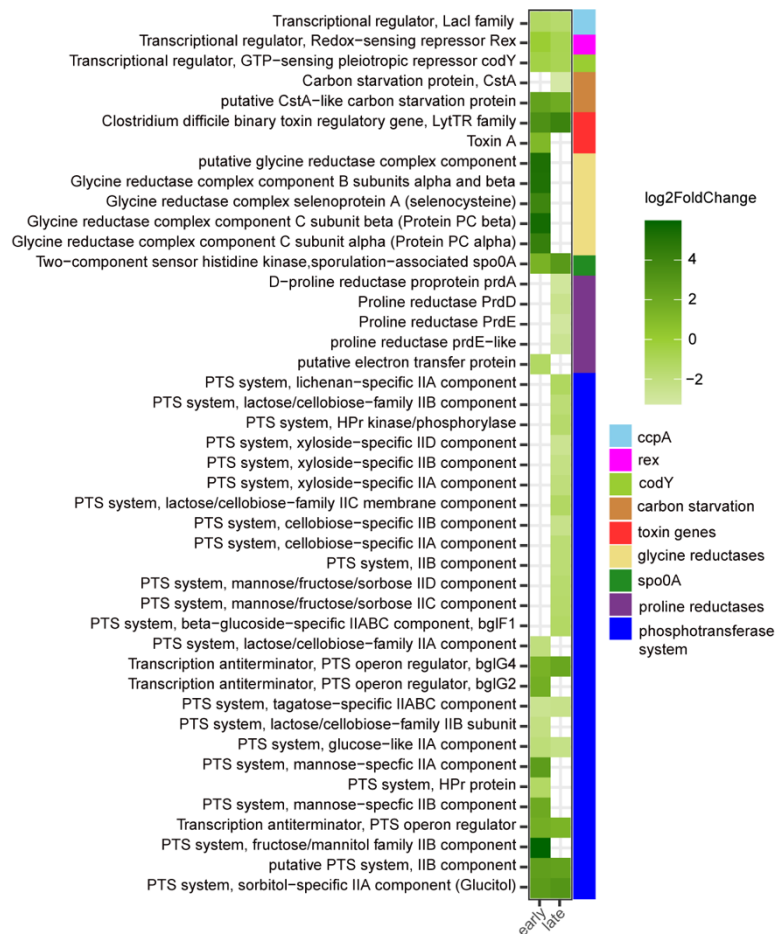

**Figure S4. Butyrate increases the expression of carbohydrate metabolism genes.**

Heatmap of selected significant genes representing the log<sub>2</sub>FoldChange of growth in butyrate versus without butyrate in early- and late-log calculated using DESeq in R as described for RNASeq analysis in Materials and Methods. Significance ( $p < 0.05$ ) was calculated using Wald's test; all genes listed are significantly over- or under-expressed over growth in BHI alone except *ccpA* (not significant).



**Figure S5. Butyrate modulates select *C. difficile* carbohydrate metabolism and virulence regulators.** Relative abundance of normalized transcript counts of select significant genes in early- and late-log. Normalized transcripts were obtained using nnTransform in DESeq. The significance was calculated by one-way ANOVA between transcripts from BHI growth with or without butyrate \*p-value < 0.05; \*\*p-value < 0.01; \*\*\*p-value < 0.001
